# Supplementary material
Source: publisher figshare collection journal article supplement (https://gsajournals.figshare.com/ndownloader/files/17449454)
Supplement: Supplementary file 1 [file 17449454]

WT_summary_statistic	WT_P_value	WT_adjusted_P value	WT_F1_summary_statistic	WT_F1_P_value	WT_F1_adjusted_P_value	KEGG_pathway_ID	No_genes	KEGG_pathway_name	Class
127.299	1.00E-04	0.000542857	38.682	0.9443	1	00010	48	Glycolysis / Gluconeogenesis	Metabolism; Carbohydrate metabolism
63.463	0.1917	0.331118182	28.692	0.9667	1	00020	38	Citrate cycle (TCA cycle)	Metabolism; Carbohydrate metabolism
76.377	0	0	15.979	0.9397	1	00030	22	Pentose phosphate pathway	Metabolism; Carbohydrate metabolism
149.258	0	0	36.516	0.5542	0.894296471	00040	38	Pentose and glucuronate interconversions	Metabolism; Carbohydrate metabolism
89.189	6.00E-04	0.002442857	25.475	0.8173	0.955971429	00051	30	Fructose and mannose metabolism	Metabolism; Carbohydrate metabolism
100.948	0	0	32.775	0.0494	0.62814	00052	26	Galactose metabolism	Metabolism; Carbohydrate metabolism
115.108	0	0	27.582	0.4803	0.894296471	00053	28	Ascorbate and aldarate metabolism	Metabolism; Carbohydrate metabolism
9.403	0.0986	0.18924	3.015	0.6922	0.907991209	00061	4	Fatty acid biosynthesis	-
19.196	0.0357	0.083057143	5.542	0.7248	0.907991209	00062	7	Fatty acid elongation	Metabolism; Lipid metabolism
83.259	3.00E-04	0.001368	32.875	0.1146	0.74955	00071	28	Fatty acid degradation	Metabolism; Lipid metabolism
12.394	0.0685	0.141981818	4.674	0.5162	0.894296471	00072	5	Synthesis and degradation of ketone bodies	Metabolism; Lipid metabolism
25.406	0.0101	0.0315	7.001	0.4505	0.894296471	00130	7	Ubiquinone and other terpenoid-quinone biosynthesis	Metabolism; Metabolism of cofactors and vitamins
135.217	0.9439	0.987616514	60.196	1	1	00190	109	Oxidative phosphorylation	Metabolism; Energy metabolism
200.669	0.0101	0.0315	113.579	0.1924	0.812355556	00230	108	Purine metabolism	Metabolism; Nucleotide metabolism
102.953	0.4056	0.5928	70.362	0.3532	0.875321739	00240	69	Pyrimidine metabolism	Metabolism; Nucleotide metabolism
73.519	3.00E-04	0.001368	26.782	0.1465	0.760608	00250	23	Alanine, aspartate and glutamate metabolism	Metabolism; Amino acid metabolism
104.231	0	0	31.827	0.0755	0.703292308	00260	26	Glycine, serine and threonine metabolism	Metabolism; Amino acid metabolism
83.964	0	0	19.289	0.7987	0.955971429	00270	23	Cysteine and methionine metabolism	Metabolism; Amino acid metabolism
67.989	0.0164	0.044514286	30.252	0.5094	0.894296471	00280	31	Valine, leucine and isoleucine degradation	Metabolism; Amino acid metabolism
31.345	0.0139	0.040630769	13.983	0.1273	0.74955	00290	11	Valine, leucine and isoleucine biosynthesis	Metabolism; Amino acid metabolism
44.322	0.1424	0.261832258	24.466	0.4929	0.894296471	00310	25	Lysine degradation	Metabolism; Amino acid metabolism
100.379	0.0252	0.062452174	57.95	0.0979	0.74404	00330	51	Arginine and proline metabolism	Metabolism; Amino acid metabolism
12.341	0.2307	0.381156522	6.6	0.5158	0.894296471	00340	7	Histidine metabolism	Metabolism; Amino acid metabolism
62.333	1.00E-04	0.000542857	12.726	0.8901	0.994817647	00350	17	Tyrosine metabolism	Metabolism; Amino acid metabolism
41.405	5.00E-04	0.002192308	8.951	0.4493	0.894296471	00360	9	Phenylalanine metabolism	Metabolism; Amino acid metabolism
56.935	0.0018	0.006619355	19.985	0.3429	0.875321739	00380	19	Tryptophan metabolism	Metabolism; Amino acid metabolism
32.16	0.0817	0.1634	17.011	0.3288	0.875321739	00410	16	beta-Alanine metabolism	Metabolism; Metabolism of other amino acids
11.95	0.0844	0.165889655	3.823	0.6946	0.907991209	00430	5	Taurine and hypotaurine metabolism	Metabolism; Metabolism of other amino acids
36.72	0.0057	0.019690909	10.08	0.5803	0.894296471	00450	11	Selenocompound metabolism	Metabolism; Metabolism of other amino acids
220.696	0	0	54.604	0.4561	0.894296471	00480	55	Glutathione metabolism	Metabolism; Metabolism of other amino acids
186.913	0	0	62.397	0.0551	0.62814	00500	53	Starch and sucrose metabolism	Metabolism; Carbohydrate metabolism
45.947	0.5633	0.764478571	34.329	0.3459	0.875321739	00510	33	N-Glycan biosynthesis	Metabolism; Glycan biosynthesis and metabolism
53.34	0.0099	0.0315	19.32	0.6248	0.894296471	00511	21	Other glycan degradation	Metabolism; Glycan biosynthesis and metabolism
19.687	0.6125	0.811918605	17.97	0.1535	0.760608	00512	15	Mucin type O-Glycan biosynthesis	Metabolism; Glycan biosynthesis and metabolism
111.667	0	0	32.713	0.5505	0.894296471	00514	34	Other types of O-glycan biosynthesis	Metabolism; Glycan biosynthesis and metabolism
98.065	6.00E-04	0.002442857	32.579	0.8353	0.961860606	00520	38	Amino sugar and nucleotide sugar metabolism	Metabolism; Carbohydrate metabolism
15.066	0.7565	0.89834375	11.874	0.601	0.894296471	00531	13	Glycosaminoglycan degradation	Metabolism; Glycan biosynthesis and metabolism
13.768	0.2477	0.403397143	4.731	0.9319	1	00532	8	Glycosaminoglycan biosynthesis - chondroitin sulfate / dermatan sulfate	Metabolism; Glycan biosynthesis and metabolism
11.402	0.8382	0.955548	9.519	0.6596	0.894296471	00534	11	Glycosaminoglycan biosynthesis - heparan sulfate / heparin	Metabolism; Glycan biosynthesis and metabolism
112.103	2.00E-04	0.001036364	44.508	0.2653	0.846989189	00561	42	Glycerolipid metabolism	Metabolism; Lipid metabolism
55.425	0.0586	0.123711111	31.795	0.1668	0.760608	00562	28	Inositol phosphate metabolism	Metabolism; Carbohydrate metabolism
16.989	0.92	0.980186916	20.214	0.1513	0.760608	00563	17	Glycosylphosphatidylinositol(GPI)-anchor biosynthesis	Metabolism; Glycan biosynthesis and metabolism
91.909	0.072	0.146571429	48.027	0.6473	0.894296471	00564	51	Glycerophospholipid metabolism	Metabolism; Lipid metabolism
41.823	0.0996	0.18924	17.402	0.8721	0.984350495	00565	22	Ether lipid metabolism	Metabolism; Lipid metabolism
16.686	0.2648	0.419266667	8.744	0.6353	0.894296471	00590	10	Arachidonic acid metabolism	Metabolism; Lipid metabolism
13.285	0.4134	0.596551899	10.004	0.298	0.867825	00591	9	Linoleic acid metabolism	Metabolism; Lipid metabolism
31.668	0.0334	0.079325	14.367	0.2704	0.846989189	00592	13	alpha-Linolenic acid metabolism	Metabolism; Lipid metabolism
64.913	0.0034	0.0121125	24.195	0.5193	0.894296471	00600	25	Sphingolipid metabolism	Metabolism; Lipid metabolism
10.194	0.4293	0.6117525	6.183	0.5917	0.894296471	00603	7	Glycosphingolipid biosynthesis - globo series	Metabolism; Glycan biosynthesis and metabolism
8.57	0.4385	0.617148148	4.892	0.6668	0.894296471	00604	6	Glycosphingolipid biosynthesis - ganglio series	Metabolism; Glycan biosynthesis and metabolism
108.375	3.00E-04	0.001368	40.363	0.5576	0.894296471	00620	42	Pyruvate metabolism	Metabolism; Carbohydrate metabolism
36.03	0.0155	0.044175	11.659	0.6301	0.894296471	00630	13	Glyoxylate and dicarboxylate metabolism	Metabolism; Carbohydrate metabolism
54.743	0.0105	0.0315	20.55	0.5984	0.894296471	00640	22	Propanoate metabolism	Metabolism; Carbohydrate metabolism
38.296	0.0378	0.084494118	19.211	0.2259	0.846989189	00650	17	Butanoate metabolism	Metabolism; Carbohydrate metabolism
33.673	0.0105	0.0315	16.956	0.0219	0.407142857	00670	11	One carbon pool by folate	Metabolism; Metabolism of cofactors and vitamins
30.316	0.0199	0.052693333	9.596	0.654	0.894296471	00740	11	Riboflavin metabolism	Metabolism; Metabolism of cofactors and vitamins
15.101	0.0161	0.044514286	2.931	0.7079	0.907991209	00750	4	Vitamin B6 metabolism	Metabolism; Metabolism of cofactors and vitamins
19.525	0.1993	0.339107463	13.479	0.1632	0.760608	00760	11	Nicotinate and nicotinamide metabolism	Metabolism; Metabolism of cofactors and vitamins
23.937	0.0208	0.052693333	9.275	0.2482	0.846989189	00770	8	Pantothenate and CoA biosynthesis	Metabolism; Metabolism of cofactors and vitamins
56.532	0.0017	0.00646	21.894	0.1239	0.74955	00790	18	Folate biosynthesis	Metabolism; Metabolism of cofactors and vitamins
122.313	0	0	24.547	0.8218	0.955971429	00830	29	Retinol metabolism	Metabolism; Metabolism of cofactors and vitamins
136.184	0	0	35.186	0.7913	0.955971429	00860	40	Porphyrin and chlorophyll metabolism	Metabolism; Metabolism of cofactors and vitamins
19.363	0.3072	0.466944	12.968	0.3171	0.875321739	00900	12	Terpenoid backbone biosynthesis	Metabolism; Metabolism of terpenoids and polyketides
337.534	0	0	82.919	0.0066	0.285	00903	66	Limonene and pinene degradation	Metabolism; Metabolism of terpenoids and polyketides
43.187	0.0299	0.072523404	19.793	0.3623	0.878770213	00910	19	Nitrogen metabolism	Metabolism; Energy metabolism
110.606	1.00E-04	0.000542857	34.078	0.7403	0.917328261	00970	38	Aminoacyl-tRNA biosynthesis	Genetic Information Processing; Translation
279.229	0	0	59.447	0.3489	0.875321739	00980	58	Metabolism of xenobiotics by cytochrome P450	Metabolism; Xenobiotics biodegradation and metabolism
32.068	0.001	0.003931034	3.294	0.9249	1	00981	6	Insect hormone biosynthesis	Metabolism; Metabolism of terpenoids and polyketides
275.141	0	0	60.004	0.3771	0.894296471	00982	59	Drug metabolism - cytochrome P450	Metabolism; Metabolism of terpenoids and polyketides
181.785	0	0	56.702	0.272	0.846989189	00983	54	Drug metabolism - other enzymes	Metabolism; Metabolism of terpenoids and polyketides
36.93	0.0366	0.083448	13.784	0.7144	0.907991209	01040	16	Biosynthesis of unsaturated fatty acids	Metabolism; Lipid metabolism
2021.014	0	0	814.493	0.6287	0.894296471	01100	834	Metabolic pathways	-
18.617	0.0404	0.088569231	7.051	0.4287	0.894296471	02010	7	ABC transporters	Environmental Information Processing; Membrane transport
87.017	0.5758	0.772249412	64.181	0.3045	0.867825	03008	62	Ribosome biogenesis in eukaryotes	Genetic Information Processing; Translation
213.614	0	0	33.276	1	1	03010	77	Ribosome	Genetic Information Processing; Translation
150.801	0.6865	0.863921739	104.043	0.6438	0.894296471	03013	109	RNA transport	Genetic Information Processing; Translation
57.459	0.9712	0.990680357	50.145	0.5633	0.894296471	03015	52	mRNA surveillance pathway	Genetic Information Processing; Translation
57.361	0.7843	0.91234898	45.439	0.405	0.894296471	03018	45	RNA degradation	Genetic Information Processing; Translation
25.73	0.8788	0.970183019	22.294	0.5166	0.894296471	03020	23	RNA polymerase	Genetic Information Processing; Translation
21.114	0.9991	0.9991	25.617	0.5809	0.894296471	03022	27	Basal transcription factors	Genetic Information Processing; Translation
35.801	0.8356	0.955548	20.425	0.9864	1	03030	30	DNA replication	Genetic Information Processing; Replication and repair
113.941	0.8916	0.970183019	97.263	0.1315	0.74955	03040	90	Spliceosome	Genetic Information Processing; Transcription
85.413	0.0542	0.116581132	25.151	1	1	03050	46	Proteasome	Genetic Information Processing; Folding, sorting and degradation
16.316	0.9922	0.9991	11.916	0.9922	1	03060	20	Protein export	Genetic Information Processing; Folding, sorting and degradation
14.991	0.8478	0.956922772	14.493	0.3873	0.894296471	03410	14	Base excision repair	Genetic Information Processing; Replication and repair
33.944	0.8983	0.970183019	29.551	0.4817	0.894296471	03420	30	Nucleotide excision repair	Genetic Information Processing; Replication and repair
26.024	0.269	0.420082192	12.854	0.8097	0.955971429	03430	16	Mismatch repair	Genetic Information Processing; Replication and repair
16.331	0.6525	0.855	13.078	0.4329	0.894296471	03440	13	Homologous recombination	Genetic Information Processing; Replication and repair
5.429	0.6913	0.863921739	6.338	0.2037	0.82935	03450	5	Non-homologous end-joining	Genetic Information Processing; Replication and repair
17.125	0.866	0.967882353	17.556	0.2825	0.8475	04013	16	MAPK signaling pathway - fly	Environmental Information Processing; Signal transduction
57.358	0.1467	0.265457143	36.612	0.1896	0.812355556	04070	33	Phosphatidylinositol signaling system	Environmental Information Processing; Signal transduction
68.27	0.0207	0.052693333	43.99	0.0075	0.285	04080	32	Neuroactive ligand-receptor interaction	Environmental Information Processing; Signaling molecules and interaction
116.185	0.6972	0.863921739	88.295	0.2697	0.846989189	04120	85	Ubiquitin mediated proteolysis	Genetic Information Processing; Folding, sorting and degradation
15.306	0.1626	0.28963125	4.411	0.9521	1	04122	8	Sulfur relay system	Genetic Information Processing; Folding, sorting and degradation
15.384	0.9675	0.990680357	15.472	0.6234	0.894296471	04130	17	SNARE interactions in vesicular transport	Genetic Information Processing; Folding, sorting and degradation
15.077	0.7521	0.89834375	10.977	0.723	0.907991209	04140	13	Regulation of autophagy	Cellular Processes; Transport and catabolism
126.834	0.9443	0.987616514	100.429	0.5448	0.894296471	04141	103	Protein processing in endoplasmic reticulum	Genetic Information Processing; Folding, sorting and degradation
122.384	0.1413	0.261832258	65.495	0.8536	0.973104	04142	74	Lysosome	Cellular Processes; Transport and catabolism
91.181	0.7701	0.905065979	83.531	0.0157	0.35796	04144	69	Endocytosis	Cellular Processes; Transport and catabolism
81.453	0.4653	0.646880488	40.673	0.994	1	04145	56	Phagosome	Cellular Processes; Transport and catabolism
155.663	1.00E-04	0.000542857	59.414	0.5338	0.894296471	04146	61	Peroxisome	Cellular Processes; Transport and catabolism
21.885	0.7394	0.896719149	21.67	0.1306	0.74955	04150	18	mTOR signaling pathway	Environmental Information Processing; Signal transduction
81.129	0.9021	0.970183019	69.617	0.2453	0.846989189	04310	66	Wnt signaling pathway	Environmental Information Processing; Signal transduction
37.065	0.2742	0.422416216	32.37	0.0117	0.33345	04320	23	Dorso-ventral axis formation	Organismal Systems; Development
29.741	0.257	0.412647887	22.717	0.0872	0.710057143	04330	18	Notch signaling pathway	Environmental Information Processing; Signal transduction
28.556	0.6609	0.856165909	24.446	0.2345	0.846989189	04340	22	Hedgehog signaling pathway	Environmental Information Processing; Signal transduction
21.887	0.9733	0.990680357	24.975	0.2749	0.846989189	04350	23	TGF-beta signaling pathway	Environmental Information Processing; Signal transduction
12.638	0.3338	0.5007	7.145	0.5899	0.894296471	04512	8	ECM-receptor interaction	Environmental Information Processing; Signaling molecules and interaction
30.683	0.2164	0.362788235	22.787	0.0764	0.703292308	04630	18	Jak-STAT signaling pathway	Environmental Information Processing; Signal transduction
24.983	0.7051	0.864316129	16.472	0.8082	0.955971429	04650	20	Natural killer cell mediated cytotoxicity	Organismal Systems; Immune system
16.192	0.5336	0.732896386	16.669	0.0529	0.62814	04710	12	Circadian rhythm	Organismal Systems; Environmental adaptation
11.629	0.1661	0.291313846	17.247	0	0	04711	6	Circadian rhythm - fly	Organismal Systems; Environmental adaptation
34.552	0.3909	0.578735065	30.89	0.025	0.407142857	04745	23	Phototransduction - fly	Organismal Systems; Sensory system
49.068	0.6871	0.863921739	43.501	0.0802	0.703292308	04914	37	Progesterone-mediated oocyte maturation	Organismal Systems; Endocrine system
